# Supplementary material for: Clinical and laboratory studies of the novel cyclin-dependent kinase inhibitor dinaciclib (SCH 727965) in acute leukemias
Source: PubMed Central journal article supplement (PMC3784060; doi:10.1007/s00280-013-2249-z), 2013-08-15
Supplement: 280_2013_2249_MOESM2_ESM.pdf [file 280_2013_2249_MOESM2_ESM.pdf]

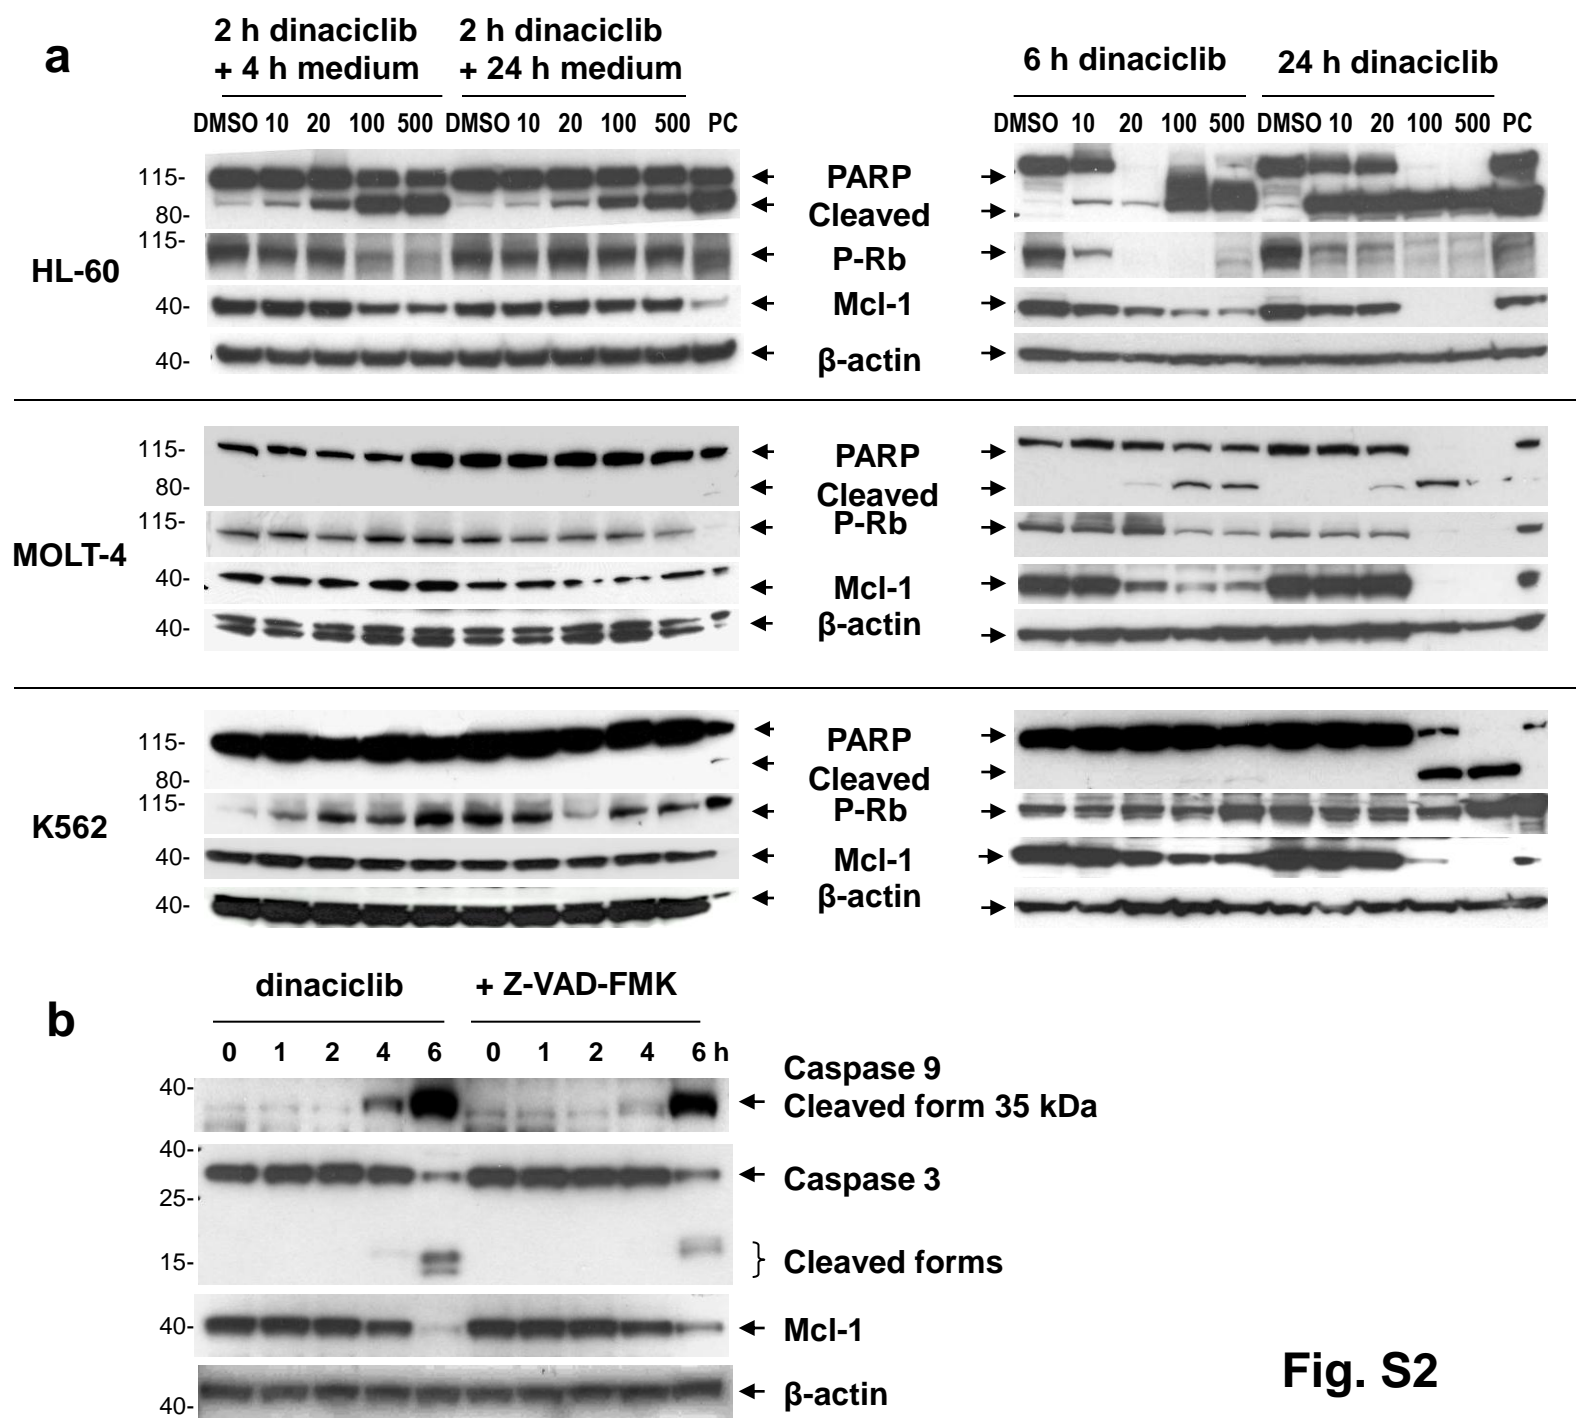

**Fig. S2**
